# Supplementary material
Source: MDPI journal article supplement (https://www.mdpi.com/2227-9717/9/3/426)
Supplement: s1 [file s1]

---

Article

# Supplementary Materials: Flavonoids Induce Migration Arrest and Apoptosis in Detroit 562 Oropharynx Squamous Cell Carcinoma Cells

Arkadiusz Dziedzic <sup>1,\*</sup>, Robert Kubina <sup>2</sup>, Robert D. Wojtyczka <sup>3</sup>, Marta Tanasiewicz <sup>1</sup>, Elena Varoni <sup>4</sup> and Marcello Iriti <sup>5</sup>

<sup>1</sup> Department of Conservative Dentistry with Endodontics, Medical University of Silesia, Pl. Akademicki 17, 41-902 Bytom, Katowice, Poland; martatanasiewicz@sum.edu.pl

<sup>2</sup> Department and Institute of Pathology, School of Pharmacy and Division of Laboratory Medicine in Sosnowiec, Medical University of Silesia, ul. Ostrogórska 30, 41-200 Sosnowiec, Katowice, Poland; rkubina@sum.edu.pl

<sup>3</sup> Department of Microbiology and Virology, School of Pharmacy and Division of Laboratory Medicine in Sosnowiec, Medical University of Silesia, ul. Jagiellońska 4, 41-200 Sosnowiec, Poland; rwojtyczka@sum.edu.pl

<sup>4</sup> Department of Biomedical, Surgical and Dental Sciences, University of Milan, Milan Via Beldiletto, 20142, Italy; elena.varoni@unimi.it

<sup>5</sup> Department of Agricultural and Environmental Sciences, University of Milan, via G. Celoria 2, 20133 Milan, Italy; mrcello.iriti@unimi.it

\* Correspondence: adziedzic@sum.edu.pl; Tel: +48-32-39560-13

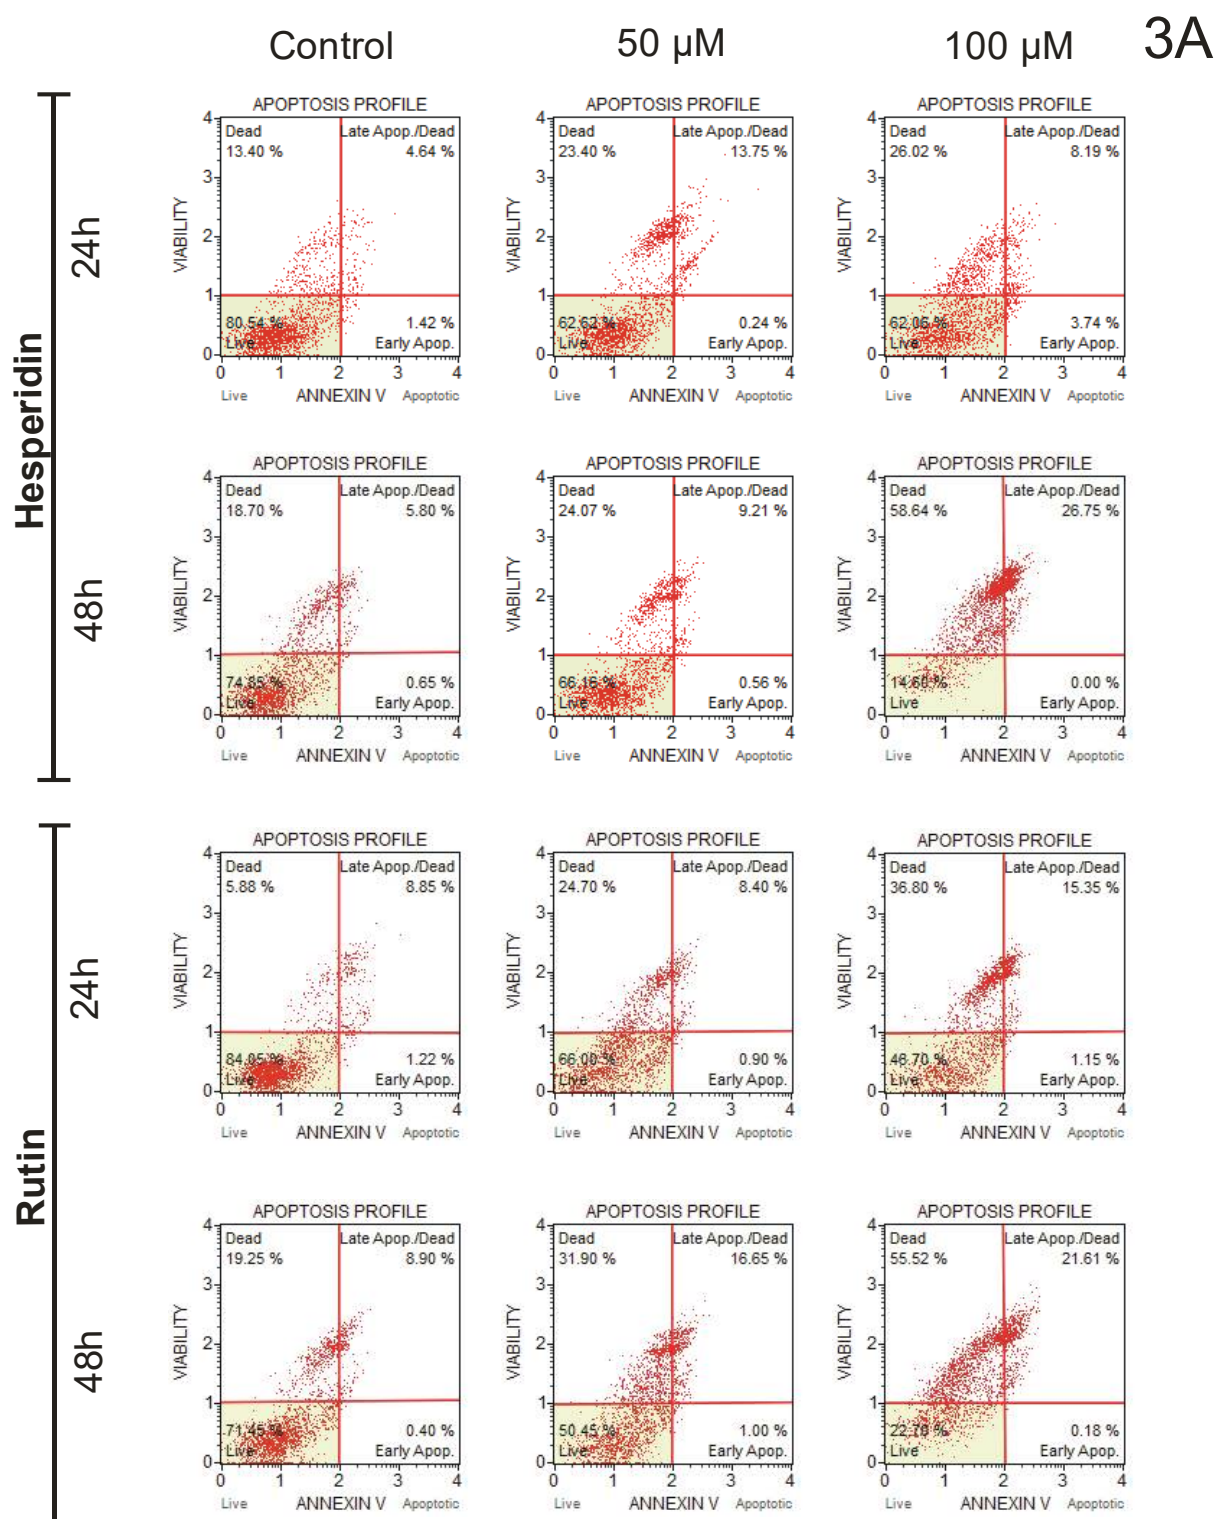

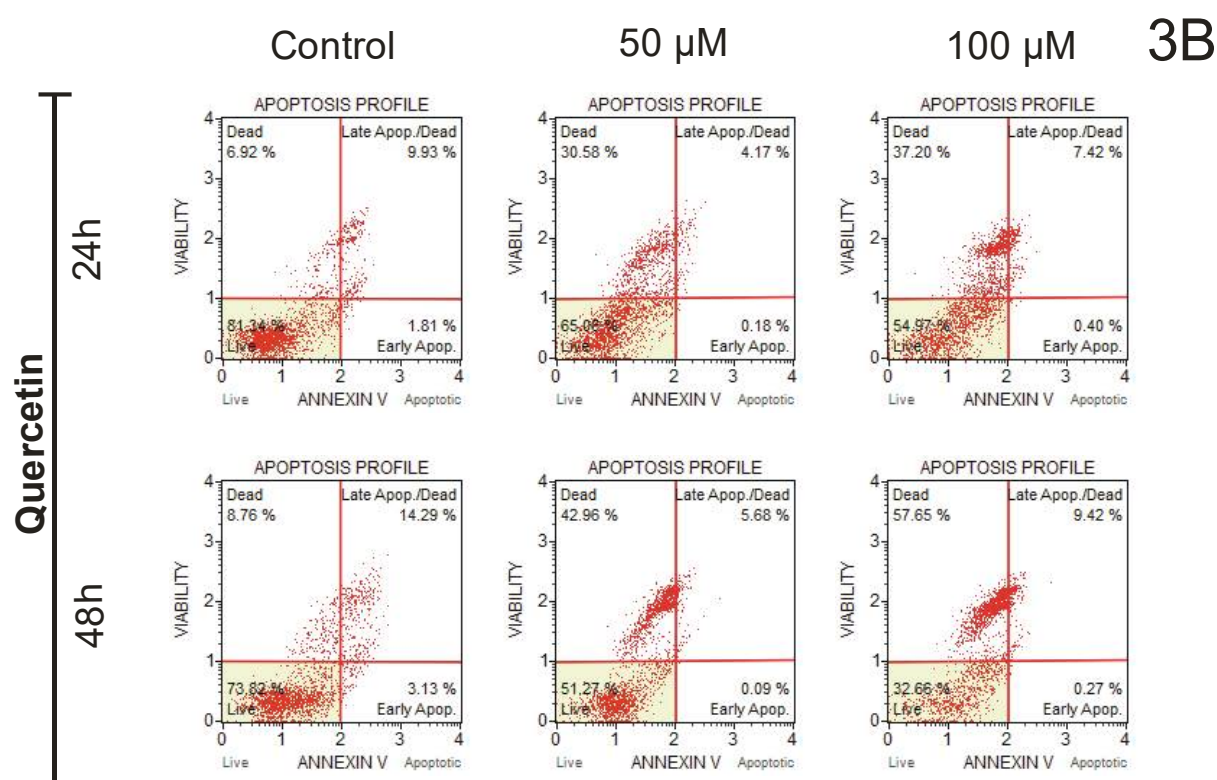

Induction of Detroit 562 cell apoptosis resulted from 24 h and 48 h exposure to quercetin, hesperidin and rutin (A, B), assessed by flow cytometry. Early apoptotic Detroit 562 HNSCC cells are presented in scatter plot's lower-right quadrant, and live cells are in the lower-left quadrant. Representative scatter plots obtained via flow cytometry of cells stained with annexin V, and 7-AAD illustrate the distinct distribution of viable/living Detroit 562 cells (lower left quadrant), cells with early apoptosis (lower right quadrant), late-stage apoptosis or necrotic/dead cells (upper right quadrant) and cells undergoing necrosis (the upper left quadrant). The cell death percentage fraction was obtained from the corresponding diagrams for the tested concentrations vs the control late apoptosis. All compounds induced necrosis or late apoptosis in a dose-dependent manner as measured by the Muse™ Annexin V and Dead Cell assay in the tumour cells Detroit 562, which was confirmed by marked decreased of a percentage of live cells.
